# Supplementary material for: Pyridoxamine Supplementation Effectively Reverses the Abnormal Phenotypes of Zebrafish Larvae With PNPO Deficiency
Source: PubMed Central journal article supplement (PMC6764245; doi:10.3389/fphar.2019.01086), 2019-09-20

Suppl. 1

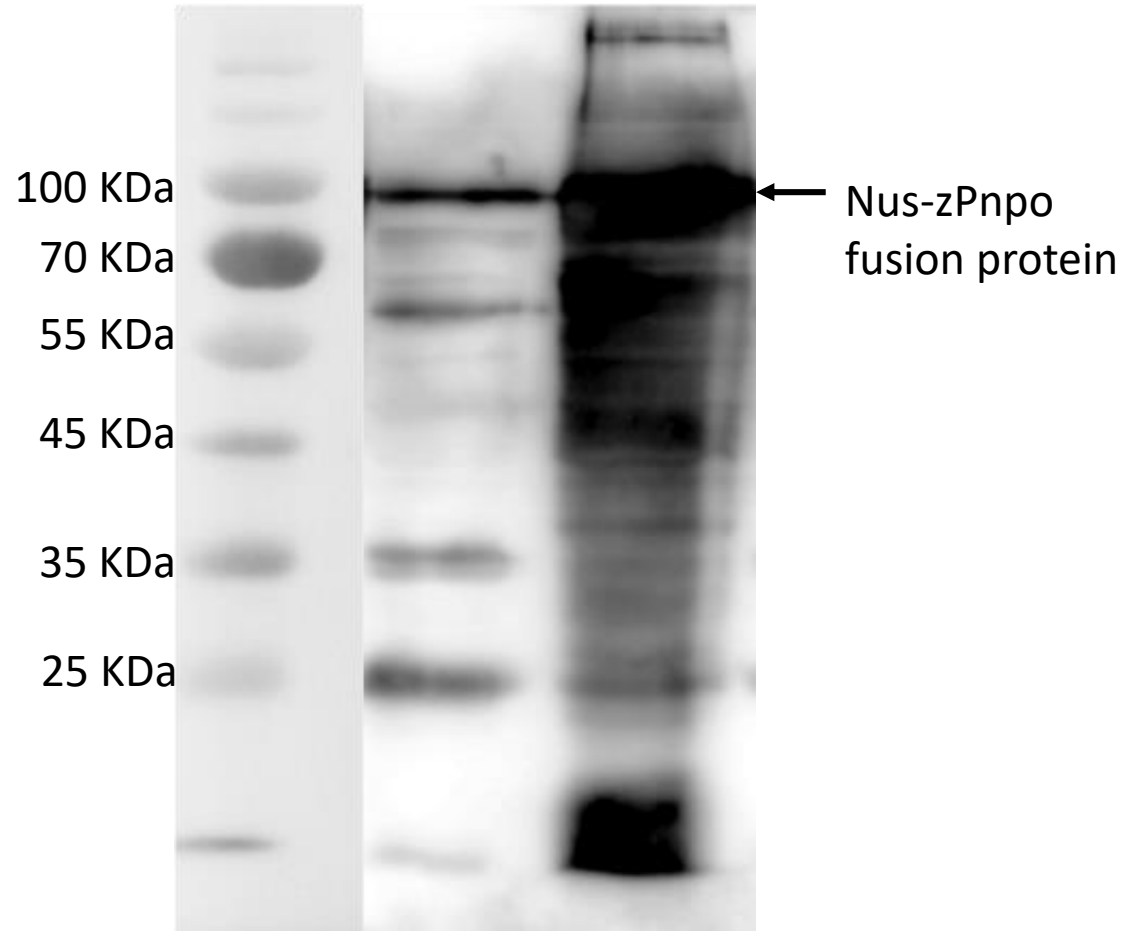

Suppl. 2

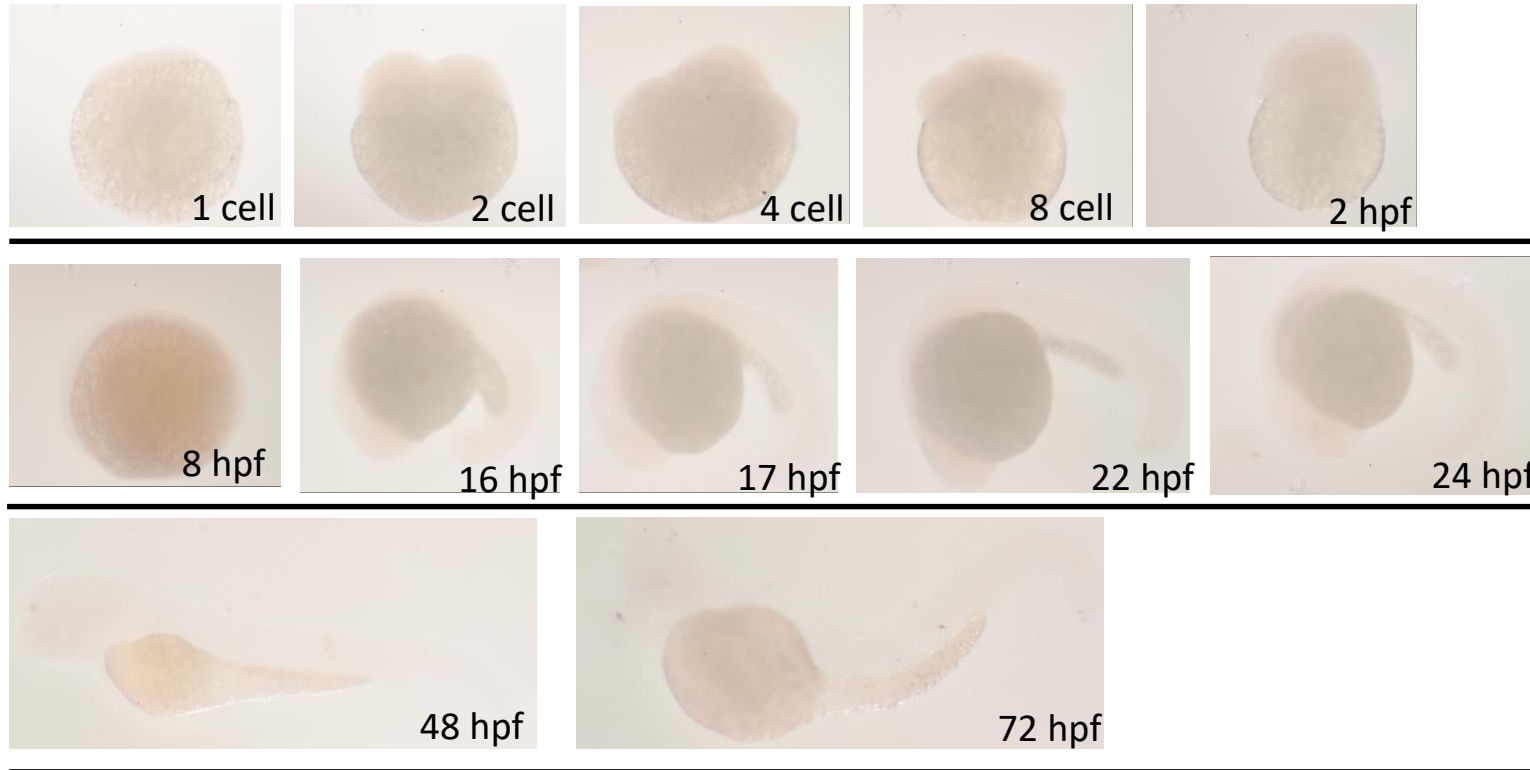

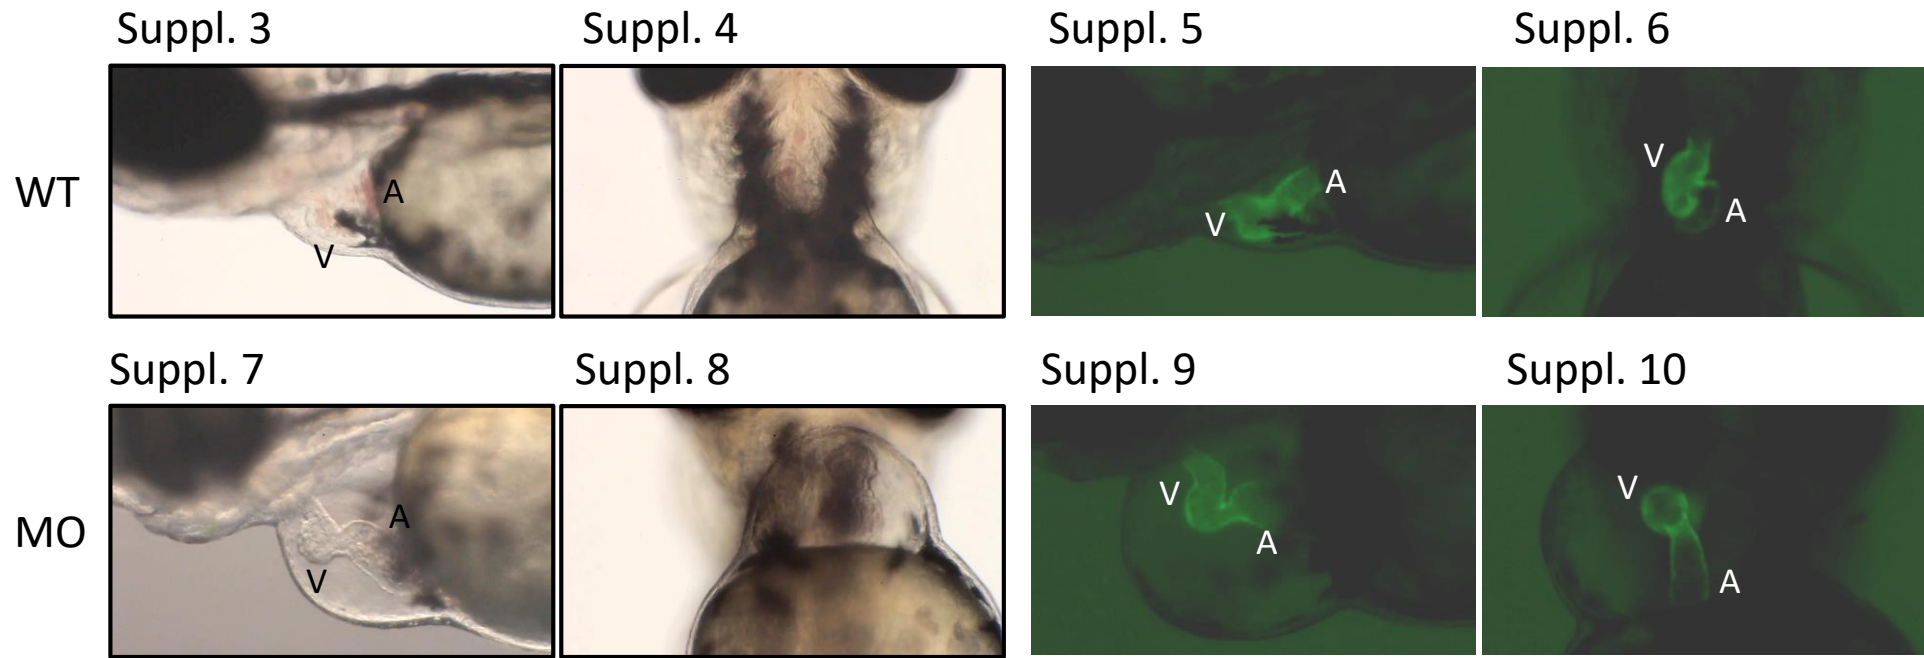

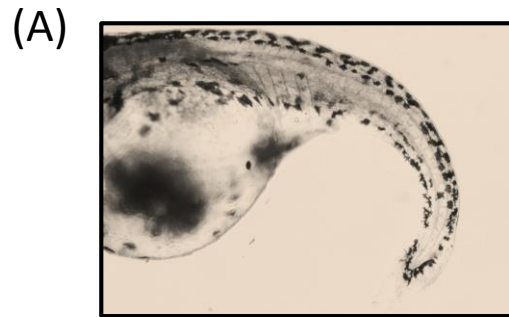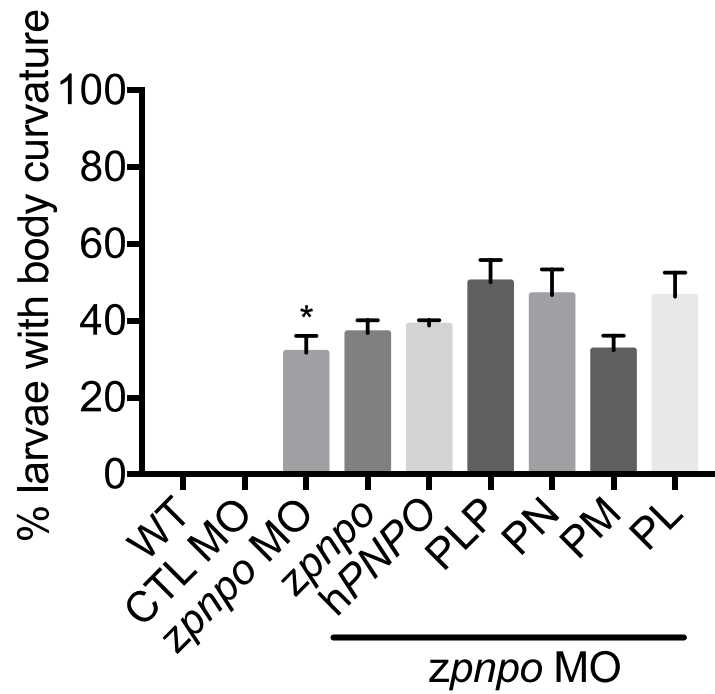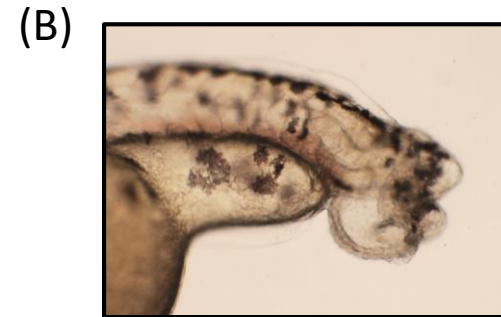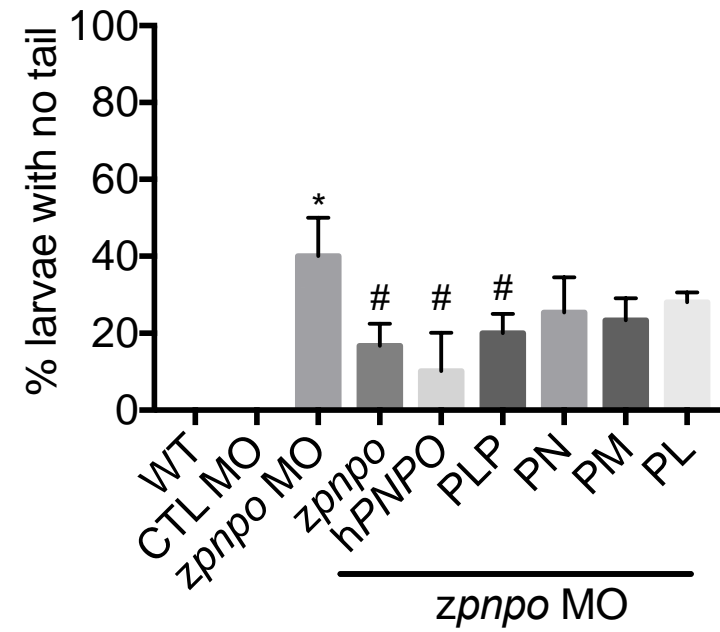

Supplement: DataSheet_1.pdf [file DataSheet_1.pdf]
